# Supplementary material for: Determination of energy level alignment at interfaces of hybrid and organic solar cells under ambient environment
Source: Royal Society of Chemistry journal article supplement (doi:10.1039/c0jm02349c), 2010-11-26
Supplement: c0jm02349c.pdf [file c0jm02349c.pdf]

Manuscript for submission to the Journal of Materials Chemistry

## Determination of Energy Level Alignment at Interfaces of Hybrid and Organic Solar Cells under Ambient Environment

By Robert J. Davis, Matthew T. Lloyd, Summer R. Ferreira, Matthew J. Bruzek, Scott E. Watkins, Linda Lindell, Parisa Sehati, Mats Fahlman, John E. Anthony, and Julia W. P. Hsu

### Supporting Information

The IP's of P3HT, TIPS-pentacene and PCBM films was measured by PESA in air. PESA spectra of these organic films on glass substrates are shown in **Fig. S1** along with the response for bare glass. For organic semiconductors the threshold energy for yield of electrons from the surface corresponds to the IP of the film.<sup>12,13</sup> These IP's are listed in Table 1.

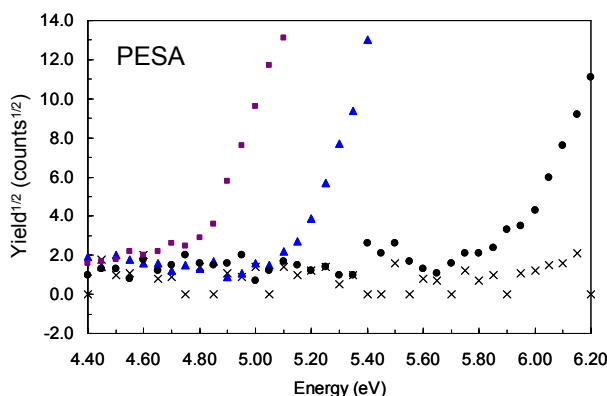

**Fig. S1** PESA spectra measured in dry air for thin films of P3HT (■), TIPS-pentacene (▲), and PCBM (●) on glass. The instrument response from a bare glass substrate (X) is shown for comparison.

X-ray diffraction (XRD) spectra (**Fig. S2A**) were collected for spin-cast TIPS-pentacene and 1:1 P3HT:TIPS-pentacene films annealed at 150°C on Si in order to access the crystallinity of TIPS-pentacene in these films. This data was collected with a Philips X'Pert MPD X-ray Diffractometer using a Cu anode and a  $\Theta/2\Theta$  (incident beam angle/detected beam angle) configuration. XRD of the spin-cast TIPS-pentacene films shows peaks at 5.4, 10.7, 12.7 and 16.1° consistent with molecular ordering similar to that reported for bulk TIPS-pentacene crystals<sup>31</sup> XRD of the mixed 1:1 P3HT:TIPS-pentacene film shows less order with only two, less intense peaks present at 10.7 and 16.0° despite similar quantities of TIPS-pentacene in the films.

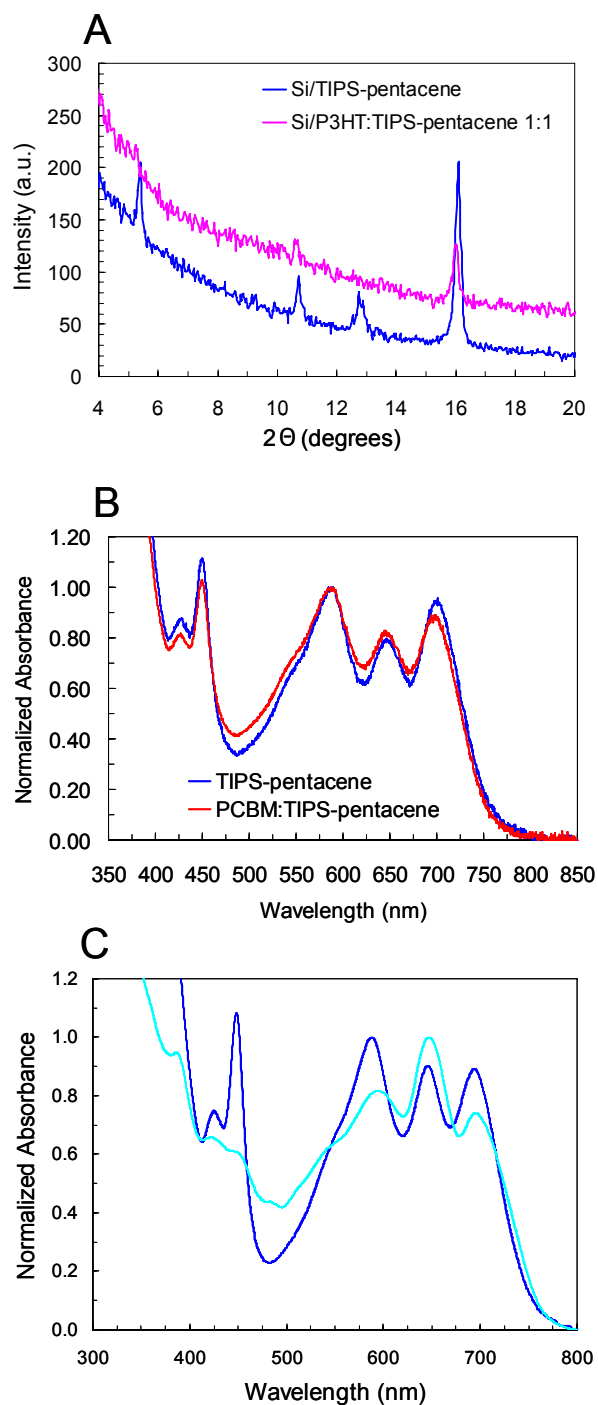

**Fig. S2** (A) XRD of a spun cast TIPS-pentacene film and a spun cast 1:1 P3HT:TIPS-pentacene film annealed at 150°C, and (B) Normalized UV-Vis spectra of a TIPS-pentacene film and a mixed 1:1 PCBM:TIPS-pentacene film, (C) Normalized UV-Vis spectra for drop cast (light blue) and spun cast (dark blue) thin films of TIPS-pentacene on ZnO

A comparison of the normalized UV-Vis spectra of ZnO/TIPS-pentacene and ZnO/PCBM:TIPS-pentacene films are depicted in **Fig. S2B**, corresponding to the devices shown in **Fig. 5**. Both the TIPS-pentacene and PCBM:TIPS-pentacene films show the characteristic absorption peaks at 425 and 450 nm noted above to correspond to disordered TIPS-pentacene. Comparison of the position and peak intensity of the absorption peaks at 425, 450, 600, 650 and 700 nm for these two films confirms that TIPS-pentacene is present in both. These results confirm that TIPS-pentacene does not entirely react with PCBM in a solution of chlorobenzene prior to film deposition, although it should be noted that even a small amount of adduct formation between TIPS-pentacene and PCBM may significantly alter device performance without being readily measurable by UV-Vis.

In order to access the degree of molecular order of spin-cast TIPS-pentacene films used in this study, TIPS-pentacene films were prepared by drop casting and spin coating (at 1000 rpm for 1 min) from a solution of 20 g/L TIPS-pentacene in toluene onto cleaned glass substrates. Normalized UV-Vis spectra for these TIPS-pentacene films are shown in **Fig. S2C**. Drop-cast TIPS-pentacene films prepared by this method have been reported to be highly crystalline.<sup>31</sup> The onset of absorption for spin-cast TIPS-pentacene films is very slightly blue shifted compared to that for the drop-cast film, consistent with lower molecular order in the spin-cast film. In addition sharp peaks appear at 425 and 450 nm in the more disordered spin-cast film, along with a change in the relative intensities of the peaks at 600, 650 and 700 nm. These changes in the absorption characteristics of the spin-cast TIPS-pentacene film suggest that it is less crystalline than the drop-cast film which likely leads to reduced mobility.
